# Supplementary material
Source: publisher site journal article supplement (https://www.degruyterbrill.com/publication/journal_key/MATH/downloadAsset/MATH_RightsLink_Author_Completing_Invoice_CN2024.pdf)
Supplement: Supplementary file 1 [file MATH_RightsLink_Author_Completing_Invoice_CN2024.pdf]

# 完成作者付费

RightsLink 让作者能够以一个更加简单的过程来支付文章处理费（APC）。如有应付的任何费用，您可以使用信用卡进行支付，也可以索取发票并将其提交给您的机构。

**请注意：**即使应付费用为零，您仍必须完成 RightsLink 上的交易，您的文章才能得以发表。

## 费用估算

完成作者付费的第一步就是获取费用估算。您可在此页面点击您的文章标题和您的姓名下方的“显示更多（show more）”。这将便于您查看关于您的文章的更多信息，包括完整的作者和资助者名单；您的发票上将印有这些信息，因此您可能需要对它们进行审查。如需作出任何更改，请联系您的出版商。

您的机构可能会向您提供资金，在此情况下，您将看到如下图所示的“资金选项”。在这种情况下，请参阅《资金申请指南》（Funding Request guide）了解更多信息。

### 1. 资金选项

Pay author charges for

Review of recent advances

Manuscript ID: 5675658568 | Primary Author: John Smith

Funder(s): National Science Foundation [Show more](#)

Charges Estimate

Billing Details

Order Confirmation

Welcome. This publisher has partnered with Copyright Clearance Center's RightsLink service to offer a convenient way to pay your author charges. Determine the charges associated with publishing your manuscript below.

1

Funding Options

You may be eligible for funding under one or more institutional agreements

You can seek funding directly from your institution for your article processing charges (calculated on the next page) by making the appropriate institution selection below and clicking "Next". If you have questions about the funding or your eligibility, use the institution's contact information provided. Alternatively, if you wish to pay your article processing charges on your own, choose "Bill Me" below and click "Next".

☐ Seek Funding From CCC University

☐ Bill Me

Next

Total Due:

Pending\*

Original Total Due:

Pending

Total Discount:

Pending

Tax:

Pending\*

\*Tax/VAT will be calculated on the next page.

请注意，您可以在流程中的任何步骤通过单击“编辑（Edit）”按钮来修改您的选项，如下图所示。

✓

### Funding Options

Completed

Funding Option: Bill Me

Edit

2. 可结账的费用

2 Available Charges

Currency:  
USD

☒ Open Access charge (mandatory)

1,900.00 USD

☒ Page charge (mandatory)

230.00 USD

DISCOUNTS APPLIED

-103.50 USD

☒ Color charge (mandatory)

300.00 USD

Total Charges: 2,326.50 USD\*

Tax/VAT will be calculated on the next page.

Next

Total Due: Pending\*

Original Total Due: Pending

Total Discount: Pending

Tax: Pending\*

Tax/VAT will be calculated on the next page.

如果您的机构没有可用的资金，那么您必须首先在“可结账的费用（Available Charges）”步骤中选择您的选项。在某些情况下，您将没有任何可用的选项；但在其他情况下，您可能可以选择例如 CC 许可证类型或彩色图形的数量等选项。请注意，需要勾选“必选（mandatory）”项目才能完成交易。

### 3. 应用折扣

3

Apply Discounts (optional)

Be sure to review and update your information provided below and/or enter promo codes. Once press **Next** button, your charges will reflect any author discounts applied.

Country Discount

United States

Pending

Membership Discount (Number)

Enter membership number

No Discount

Your Institution

Type and select your institution

No Discount

Can't find your institution?

Promotion Code Discount:

Promotion Code/Waiver

Enter a promo code

Check Promo Code

No Discount

Total Discount:

Pending

Skip

Apply

Next

Total Due:

2,430.00 USD\*

Original Total Due:

2,430.00 USD

Total Discount:

Pending

Tax:

Pending\*

\*Tax/VAT will be calculated on the next page.

在完成“可结账的费用（Available Charges）”部分以后，您可以在右侧不动的小窗口中看到您的应付款总额。此时您便可选择“国家、会员和/或机构折扣”，或输入促销代码，然后点击“应用（Apply）”以计算您的总折扣金额。并非所有折扣类型都适用于您的出版商。单击“下一步（Next）”进入第四步骤：“付款人信息（Payer Information）”。

### 4. 付款人信息

4

Payer Information

Total Due: 2,430.00 USD\*

See full pricing details

\*Tax/VAT will be calculated on the next page.

Will these charges be paid by an organization?

If an organization will be paying you back for these fees, select **Yes**.

☐ Yes

☐ No

I will pay from my personal funds and will not seek reimbursement from another party.

Next

Total Due:

2,430.00 USD\*

Original Total Due:

2,430.00 USD

Total Discount:

0.00 USD

Tax:

Pending\*

\*Tax/VAT will be calculated on the next page.

在这里通过点击“[查看全部定价详情（see full pricing details）](#)”，您可以看到一个包含所有费用和总额的交互式表格，而且您可以点击每个部分以展开查看更多价格明细。您可以在这一部分选择是要由个人资金还是由某个组织来支付费用。

- 由组织付款：如果费用将由组织支付，您则必须选择组织类型：我的机构、我的资助者或其他组织，以及其各自的国家。然后，您可能需要注明您的组织是否免税、该组织的税号以及您的组织是否需要订购单号。最后，您需要指明付款方式（通过信用卡或发票）。
- 用个人资金付款：您将直接选择付款方式

## 5. 付款方式

4

Payment Method

☒

Credit Card (Pay Now)

Your credit card will be charged immediately upon completion of this order. Within 2 hours, you will receive a payment receipt via email (an invoice for the order marked as "Paid").

☐

Generate Invoice (Pay Later)

An invoice will be generated and sent to you via email within 2 hours. The address on the invoice will be the billing address you enter below. Detailed payment instructions will be included with the invoice; you can pay invoices later by credit card, check, or wire transfer.

Registering for a RightsLink account\* will allow you to save your information for future orders and view your order history.

\* This is different from any account you may have created when submitting your manuscript.

Log In

Register

Continue as Guest

如欲通过信用卡付款，您可以登录、注册或继续以访客身份进行付款。如果您想系统为您开列发票（Invoice），则必须登录或注册（如果您没有账户的话）。请注意，即使通过发票付款，您仍可以使用信用卡进行支付。

## 账单详情

如果您选择使用信用卡付款，则需要输入您的信用卡信息并提供信用卡账单地址。

如果您要开列发票，并希望由某个组织在以后代您付款，您在此处输入的地址则应是该组织要求的账单地址。

如果您被要求输入您的所在位置，请输入您在下订单时的实际所在位置，这是用于税务的目的。

当信息填写完毕后，请接受条款和条件，然后单击“**下订单（Place Order）**”完成订购。

6 Credit Card

VISA

MasterCard

AMERICAN EXPRESS

Credit Card Type

Mastercard

Credit Card Number

XXXX XXXX XXXX XXXX

Expiration Date

MM/YYYY

CVV ⓘ

xxx

Next

Total Due:2,430.00 USD\*

Original Total Due:2,430.00 USD

Total Discount:0.00 USD

Tax:Pending\*

\*Tax/VAT will be calculated upon completion of all addresses on this page.

← Back to Charges & Discounts

## 订单确认

订单确认是完成作者付费的最后一步骤。您将收到一条确认已下订单的短信，以及一封通知，告知您将收到一封包含订单号码及其详情的电子邮件。



**Thank you for your order!**

You will receive an order confirmation email shortly containing the details of this transaction. A separate payment receipt containing a link to a PDF copy of your invoice will be sent at a later time, within 2 hours, once your invoice has been generated.

Order Number: Available in confirmation email  
Order Date: 03-Apr-2024  
Payment Status: Paid

**Tell us how we're doing!**  
We know paying author publication charges can be challenging. The RightsLink team is doing everything we can to simplify the process, and we want to hear about your experience. [Give us your feedback!](#)

Total Due: **301.63 USD**

Original Total Due: 600.00 USD  
Total Discount: 0.00 USD  
Tax: 1.63 USD

[Terms and Conditions](#)

[Order Details](#) [Print Order](#)

您也可在这里点击“**订单详情（Order Details）**”再次查看订单的详细信息。此外，您还可以点击“**应付总额（Total Due）**”中的“**打印订单（Print Order）**”。

如果您使用信用卡付款，您的订单此时已完成。如果您要求开列发票，您将在 2 小时内通过电子邮件收到一份发票。该发票上将会列明付款说明。

有疑问吗？  
请搜索 [RightsLink Knowledgebase（RightsLink 知识库）](#)。

CCC 通过软件和专业服务，以与现实情况相关的方式构建独特的解决方案，从而将内容和版权建立连接。CCC 帮助人们浏览大量的数据，因而发现可行的见解，让他们得以创新并做出明智的决策。CCC 和其子公司 RightsDirect 一起与客户合作，推动数据和信息的整合、使用和共享，同时为有效的版权解决方案设定标准，以加速知识的积累并强大创新。CCC 总部位于马萨诸塞州丹佛斯，在北美、欧洲和亚洲均设有办事处。

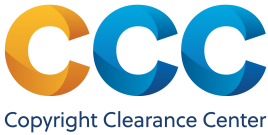

如欲了解有关 CCC 的更多信息，请访问 [www.copyright.com](http://www.copyright.com)。Copyright Clearance Center（著作权授权中心）| +1.978.750.8400 | [info@copyright.com](mailto:info@copyright.com) | [www.copyright.com](http://www.copyright.com)

© 2021 Copyright Clearance Center, Inc（著作权授权中心）。版权所有。  
RH1219
